# Supplementary material for: Large-scale prediction of adverse drug reactions-related proteins with network embedding
Source: PubMed Central journal article supplement (PMC9825773; doi:10.1093/bioinformatics/btac843), 2022-12-29
Supplement: btac843_supplementary_data.pdf [file btac843_supplementary_data.pdf]

## I. Supplementary Data

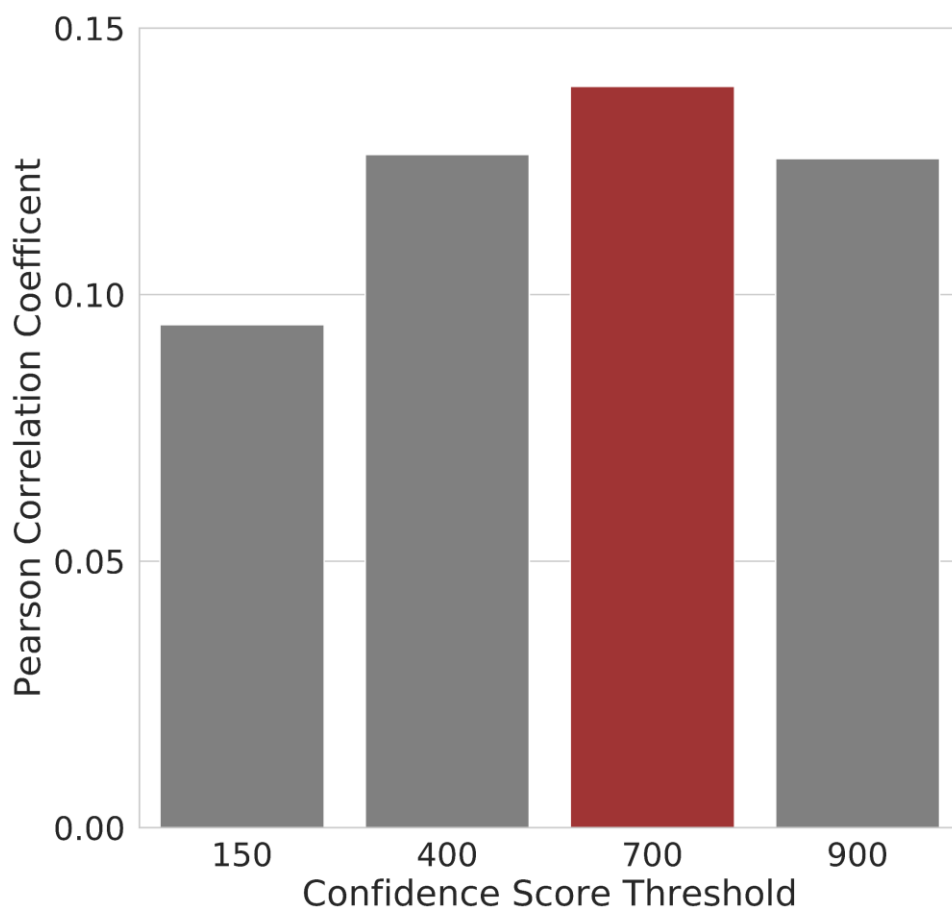

**Fig. S1. Pearson correlation coefficient between ADR similarity and target similarity of drug pairs according to threshold of confidence score for protein-protein interactions and drug-protein interactions.** Threshold of confidence score is divided into 4 categories suggested by the author of the database; low confidence(150), medium confidence(400), high confidence(700), highest confidence(900). Jaccard similarity between target vector and ADR vector were used for compute ADR similarity and target similarity.

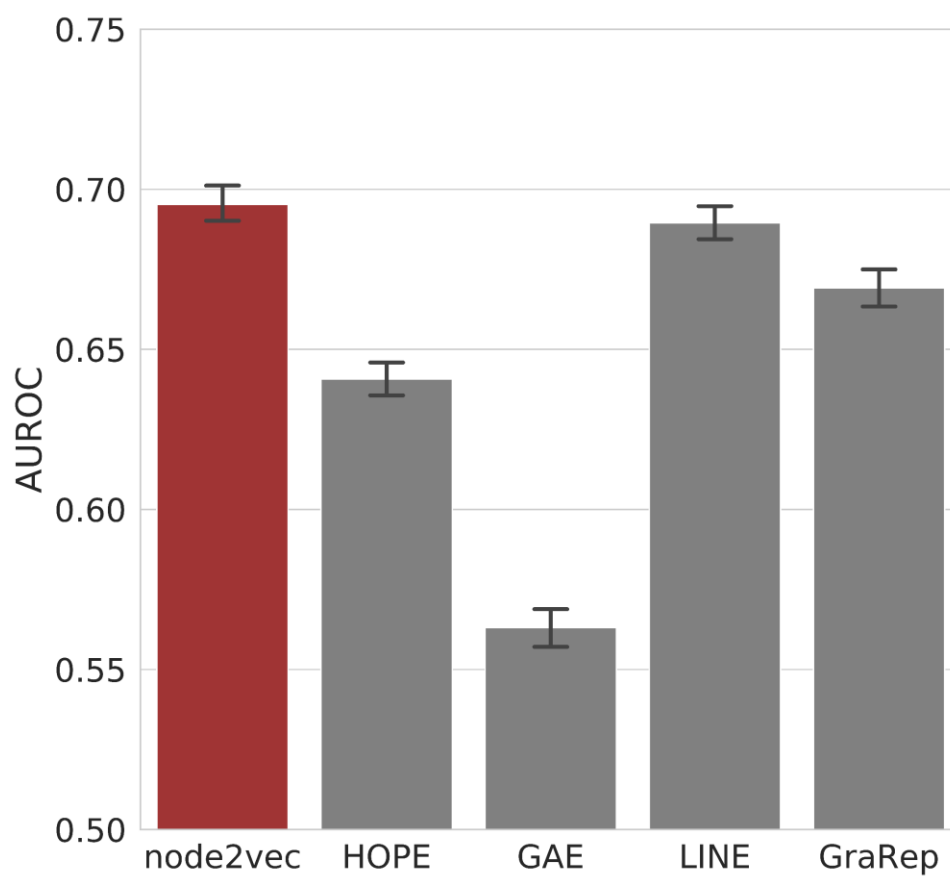

**Fig. S2. Effects of graph embedding methods on ADR predictions.** Performance of ADR predictions measured with 10-fold cross-validation. The error bar indicates the 95% confidence interval over cross-validation.

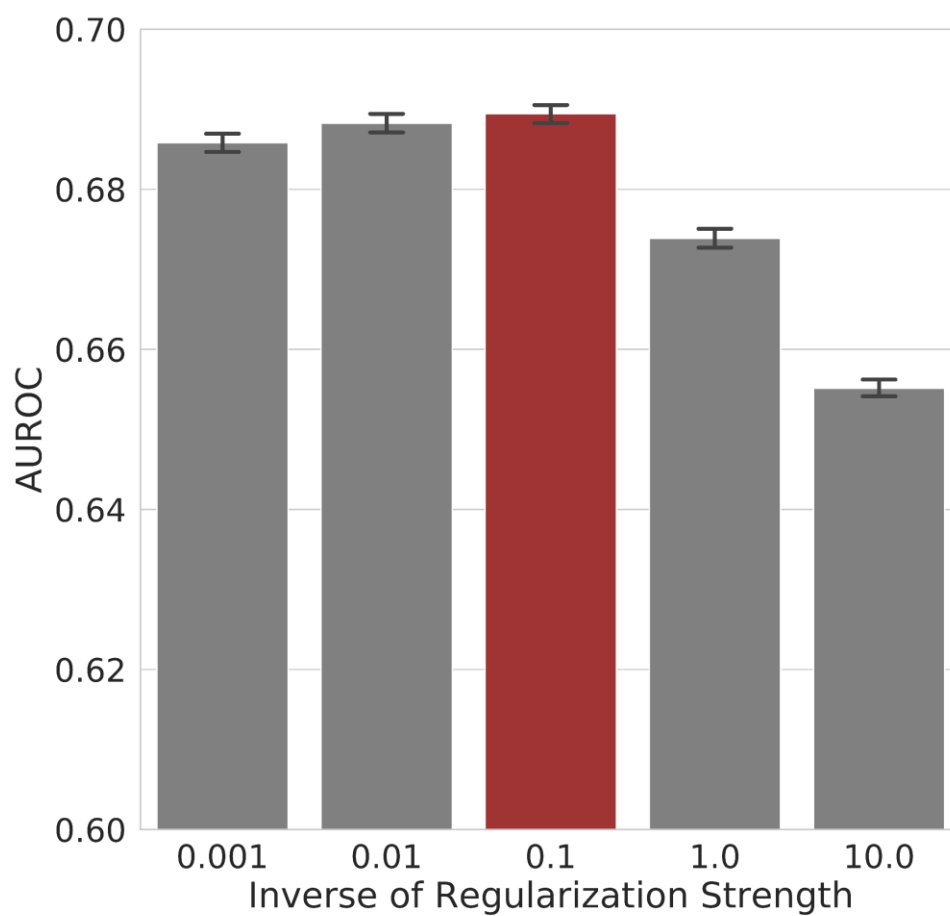

**Fig. S3. Effects of regularization strength of logistic regression on ADR predictions.** Performance of ADR predictions measured with 10-fold cross-validation. The error bar indicates the 95% confidence interval over cross-validation.

|                      | Drug binds to the protein | Drug not binds to the protein |
|----------------------|---------------------------|-------------------------------|
| Drug has the ADR     | True positive (TP)        | False negative (FN)           |
| Drug has not the ADR | False positive (FP)       | True negative (TN)            |

**Fig. S4. Confusion matrix of drugs categorized by the related ADR and binding protein.**

Using binding to a specific protein as a test for whether a drug has ADR, all drugs can be classified into one of four cases in the confusion matrix (TP, FN, FP, TN).

**Table S1. Effects of hyperparameter (p, q) of node2vec on ADR predictions.**

| <b>log(p)</b> | <b>log(q)</b> | <b>AUROC</b>         |
|---------------|---------------|----------------------|
| -2            | -2            | 0.6904±0.0057        |
| -2            | -1            | 0.6901±0.0057        |
| -2            | 0             | 0.6876±0.0059        |
| -2            | 1             | 0.688±0.0059         |
| -2            | 2             | 0.6858±0.0059        |
| -1            | -2            | 0.6906±0.0058        |
| -1            | -1            | 0.6888±0.0058        |
| -1            | 0             | 0.6888±0.0058        |
| -1            | 1             | 0.6872±0.0059        |
| -1            | 2             | 0.6895±0.0058        |
| 0             | -2            | 0.6907±0.0059        |
| 0             | -1            | 0.6885±0.0057        |
| 0             | 0             | 0.6914±0.0057        |
| 0             | 1             | 0.6890±0.0058        |
| 0             | 2             | 0.6883±0.0058        |
| 1             | -2            | 0.6903±0.0058        |
| 1             | -1            | 0.6947±0.0057        |
| 1             | 0             | 0.6906±0.0058        |
| 1             | 1             | 0.6857±0.0058        |
| 1             | 2             | 0.6838±0.0058        |
| 2             | -2            | 0.6890±0.0058        |
| 2             | -1            | <u>0.6953±0.0057</u> |
| 2             | 0             | 0.6920±0.0057        |
| 2             | 1             | 0.6913±0.0057        |
| 2             | 2             | 0.6889±0.0057        |

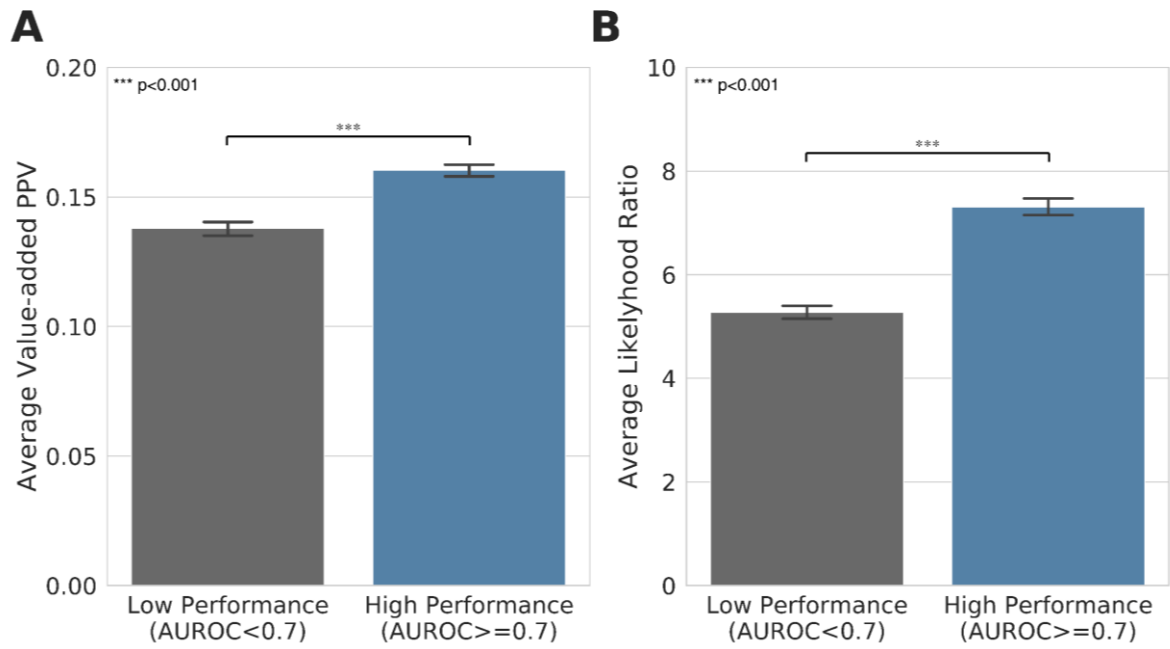

**Fig. S5. Effect of ADR prediction model performance on VAPPV and LR of top 50 predictive proteins for the ADR.** (A, B) Bar plots showing the average VAPPV and LR of the top 50 predicted proteins for two ADR groups according to the performance of their prediction models. The error bar indicates the 95% confidence interval of the average.

**Table S2.** Common pharmacological property of the top 10 drug pairs with the highest similarity in low-dimensional representation with low ADR similarity (0.0~0.2).

| Drug A          | Drug B             | Representation similarity | ADR similarity | Common pharmacological property |
|-----------------|--------------------|---------------------------|----------------|---------------------------------|
| Epinephrine     | Norepinephrine     | 0.936                     | 0.115          | catecholamine family            |
| Flurazepam      | Quazepam           | 0.930                     | 0.155          | benzodiazepines                 |
| Quazepam        | Temazepam          | 0.929                     | 0.070          | benzodiazepines                 |
| Bromazepam      | Quazepam           | 0.929                     | 0.107          | benzodiazepines                 |
| Bromazepam      | Estazolam          | 0.927                     | 0.186          | benzodiazepines                 |
| Flumazenil      | Quazepam           | 0.918                     | 0.060          | benzodiazepines                 |
| thiothixene     | Iloperidone        | 0.917                     | 0.140          | antipsychotic drugs             |
| Chloramphenicol | Papaverine         | 0.914                     | 0.095          | -                               |
| Pramipexole     | Iloperidone        | 0.913                     | 0.182          | dopamine agonist, antagonist    |
| Dorzolamide     | Hydroflumethiazide | 0.909                     | 0.076          | hypertension treatment          |

**Table S3.** Top 10 predictive proteins for epilepsy

| Rank | Symbol         | VAPPV | LR    | Reference                                                            |
|------|----------------|-------|-------|----------------------------------------------------------------------|
| 1    | <b>HTR3A</b>   | 0.330 | 3.979 | <i>Zhao et al., 2018</i>                                             |
| 5    | <b>HTR3E</b>   | N/A   | N/A   |                                                                      |
| 2    | KATNAL2        | 0.124 | 1.658 | <i>Kurul et al., 2021</i>                                            |
| 3    | CD27           | 0.374 | 4.969 | <i>Rubio et al., 2016</i>                                            |
| 4    | CD70           | N/A   | N/A   |                                                                      |
| 6    | <b>SLC7A11</b> | 0.290 | 3.316 | <i>Robert et al., 2015; Sørensen et al., 2018</i>                    |
| 7    | SLC6A4         | 0.358 | 4.591 | <i>Cárdenas-Rodríguez et al., 2020</i>                               |
| 8    | ABCC1          | 0.327 | 3.937 | <i>Van Vliet et al., 2005; Dombrowski et al., 2001</i>               |
| 9    | <b>MVP</b>     | N/A   | N/A   | <i>Sisodiya et al., 2003; Liu et al., 2011; Aronica et al., 2003</i> |
| 10   | <b>CASP3</b>   | 0.190 | 2.162 | <i>Henshall et al., 2005</i>                                         |

\*Proteins in bold have direct causal evidence for ADR

**Table S4.** Top 10 KEGG pathways enriched by the top 50 predictive proteins for epilepsy

| Rank | Name                                     | P-value | Reference                           |
|------|------------------------------------------|---------|-------------------------------------|
| 1    | <b>Serotonergic synapse</b>              | 3.6e-10 | <i>Richerson and Buchanan, 2011</i> |
| 2    | <b>Apoptosis</b>                         | 6.4e-08 | <i>Henshall and Engel, 2013</i>     |
| 3    | <b>Taste transduction</b>                | 5.5e-05 | <i>Heckmann et al., 2003</i>        |
| 4    | Drug metabolism                          | 1.5e-04 | <i>Hedges et al., 2003</i>          |
| 5    | Legionellosis                            | 3.5e-04 | <i>Johnson et al., 1984</i>         |
| 6    | Pentose and glucuronate interconversions | 3.3e-03 | -                                   |
| 7    | MicroRNAs in cancer                      | 6.6e-03 | <i>You et al., 2012</i>             |
| 8    | <b>Cocaine addiction</b>                 | 6.7e-03 | <i>Koppell et al., 1996</i>         |
| 9    | <b>Alcoholism</b>                        | 1.0e-02 | <i>Hillborm et al., 2003</i>        |
| 10   | <b>Amphetamine addiction</b>             | q.3e-02 | <i>Allrededege et al., 1989</i>     |

\*KEGG pathways in bold have direct causal evidence for ADR



**Table S5.** The summary of previous ADR-protein relation prediction studies

| Name                                   | Method                       | #Protein | #ADR  | Score type        | Supervised learning <sup>***</sup> |
|----------------------------------------|------------------------------|----------|-------|-------------------|------------------------------------|
| <a href="#">Khun et al., 2013</a>      | Fisher's exact test          | 296      | 1,428 | q-value           | No                                 |
| <a href="#">Chen et al., 2016</a>      | Random walk with restart     | 1,153    | 4,192 | probability       | Yes                                |
| <a href="#">Letswaart et al., 2020</a> | Random forest                | 184      | 321*  | Gini score        | No                                 |
| <a href="#">Smit et al., 2021</a>      | Fisher's exact test          | 100      | 3,278 | corrected p-value | No                                 |
| <a href="#">Galletti et al., 2022</a>  | Ensemble model <sup>**</sup> | 13,090   | 84    | probability       | Yes                                |
| LAPINE<br>(our method)                 | Logistic regression          | 13,633   | 4,085 | z-score           | No                                 |

\* ADR defined with the high level group term (HLGT)

\*\* SVM, Neural network, Random forest

\*\*\* The method used known ADR-protein relations to learn the prediction model

## II. References

- Allredge, B.K. *et al.* (1989) Seizures associated with recreational drug abuse. *Neurology*, **39**, 1037–1039.
- Aronica, E. *et al.* (2003) Overexpression of the human major vault protein in gangliogliomas. *Epilepsia*, **44**, 1166–1175.
- Cárdenas-Rodríguez, N. *et al.* (2020) Genetic variations associated with pharmacoresistant epilepsy (Review). *Mol. Med. Rep.*, **21**, 1685–1701.
- Chen, X. *et al.* (2016) Large-scale identification of adverse drug reaction-related proteins through a random walk model. *Sci. Rep.*, **6**, 1–10.
- Dombrowski, S.M. *et al.* (2001) Overexpression of multiple drug resistance genes in endothelial cells from patients with refractory epilepsy. *Epilepsia*, **42**, 1501–1506.
- Galletti, C. *et al.* (2022) Prediction of Adverse Drug Reaction Linked to Protein Targets Using Network-Based Information and Machine Learning. *Front. Bioinform. 2*: 906644. doi: 10.3389/fbinf
- Heckmann, J.G. *et al.* (2003) Neurological Aspects of Taste Disorders. *Arch. Neurol.*, **60**, 667–671.
- Hedges, D. *et al.* (2003) Antipsychotic medication and seizures: a review. *Drugs Today (Barc.)*, **39**, 551–557.
- Henshall, D.C. and Engel, T. (2013) Contribution of apoptosis-associated signaling pathways to epileptogenesis: Lessons from Bcl-2 family knockouts. *Front. Cell. Neurosci.*, **0**, 110.
- Henshall, D.C. and Simon, R.P. (2005) Epilepsy and apoptosis pathways. *J. Cereb. Blood Flow Metab.*, **25**, 1557–1572.
- Hillbom, M. *et al.* (2003) Seizures in alcohol-dependent patients: epidemiology, pathophysiology and management. *CNS Drugs*, **17**, 1013–1030.
- Hiz Kurul, S. *et al.* (2021) High diagnostic rate of trio exome sequencing in consanguineous families with neurogenetic diseases. *Brain*.
- Ietswaart, Robert, *et al.* (2020) "Machine learning guided association of adverse drug reactions with in vitro target-based pharmacology." *EBioMedicine* 57 102837.
- Johnson, J.D. *et al.* (1984) Neurologic manifestations of Legionnaires' disease. *Medicine (Baltimore)*, **63**, 303–310.
- Koppel, B.S. *et al.* (1996) Relation of cocaine use to seizures and epilepsy. *Epilepsia*, **37**, 875–878.

- Kuhn,M. et al. (2013) Systematic identification of proteins that elicit drug side effects. *Mol. Syst. Biol.*, **9**, 663.
- Liu,B. *et al.* (2011) Up-regulation of major vault protein in the frontal cortex of patients with intractable frontal lobe epilepsy. *J. Neurol. Sci.*, **308**, 88–93.
- Richerson,G.B. and Buchanan,G.F. (2011) The serotonin axis: Shared mechanisms in seizures, depression and SUDEP. *Epilepsia*, **52**, 28.
- Robert,S.M. *et al.* (2015) SLC7A11 expression is associated with seizures and predicts poor survival in patients with malignant glioma. *Sci. Transl. Med.*, **7**.
- Rubio,M. *et al.* (2016) Analysis of endocannabinoid signaling elements and related proteins in lymphocytes of patients with Dravet syndrome. *Pharmacol. Res. Perspect.*, **4**, 220.
- Sisodiya,S.M. *et al.* (2003) Major vault protein, a marker of drug resistance, is upregulated in refractory epilepsy. *Epilepsia*, **44**, 1388–1396.
- Smit,I.A. et al. (2021) Systematic Analysis of Protein Targets Associated with Adverse Events of Drugs from Clinical Trials and Postmarketing Reports. *Chem. Res. Toxicol.*, **34**, 365–384.
- Sørensen,M.F. *et al.* (2018) High expression of cystine-glutamate antiporter xCT (SLC7A11) is an independent biomarker for epileptic seizures at diagnosis in glioma. *J. Neurooncol.*, **138**, 49–53.
- Van Vliet,E.A. *et al.* (2005) Expression of multidrug transporters MRP1, MRP2, and BCRP shortly after status epilepticus, during the latent period, and in chronic epileptic rats. *Epilepsia*, **46**, 1569–1580.
- You,G. *et al.* (2012) Significance of miR-196b in tumor-related epilepsy of patients with gliomas. *PLoS One*, **7**.
- Zhao,H. *et al.* (2018) 5-HT<sub>3</sub> Receptors: A Potential Therapeutic Target for Epilepsy. *Curr. Neuropharmacol.*, **16**.
